# Supplementary material
Source: PubMed Central journal article supplement (PMC4023797)
Supplement: AAC.02653-13_zac004142707so1.pdf [file AAC.02653-13_zac004142707so1.pdf]

TABLE S1. Numbers of *pvl*-negative sporadic MRSA isolates recovered from patients in Irish hospitals and identified by the NMRSARL each year between 2000 and 2012

| Year          | Total no. of <i>pvl</i> -negative sporadic MRSA isolates identified by the NMRSARL <sup>a</sup> | Total number of <i>pvl</i> -negative sporadic MRSA isolates investigated in the present study | Recovered from infection <sup>d</sup> or colonization [ <i>n</i> ] |
|---------------|-------------------------------------------------------------------------------------------------|-----------------------------------------------------------------------------------------------|--------------------------------------------------------------------|
| 2000          | 195                                                                                             | 10                                                                                            | Infection [8], colonized [1], unknown [1]                          |
| 2001          | 165                                                                                             | 7                                                                                             | Infection [7]                                                      |
| 2002          | 141                                                                                             | 6                                                                                             | Infection [6]                                                      |
| 2003          | 114                                                                                             | 6                                                                                             | Infection [4], unknown [2]                                         |
| 2004          | 133                                                                                             | 8                                                                                             | Infection [5], unknown [3]                                         |
| 2005          | 96                                                                                              | 5                                                                                             | Infection [5],                                                     |
| 2006          | 107                                                                                             | 8                                                                                             | Infection [4], unknown [3], colonized [1]                          |
| 2007          | 125                                                                                             | 8 <sup>c</sup>                                                                                | Infection [7], colonized [1]                                       |
| 2008          | 113                                                                                             | 5                                                                                             | Infection [5]                                                      |
| 2009          | 129                                                                                             | 6                                                                                             | Infection [3], unknown [1], colonized [2]                          |
| 2010          | 101                                                                                             | 5                                                                                             | Infection [5]                                                      |
| 2011          | 116                                                                                             | 9                                                                                             | Infection [4], unknown [1], colonized [4]                          |
| 2012          | 128                                                                                             | 5                                                                                             | Infection [2], unknown [2], colonized [1]                          |
| <b>Totals</b> | <b>1663</b>                                                                                     | <b>88</b>                                                                                     | <b>88</b>                                                          |

<sup>a</sup>The *pvl*-negative status of isolates was determined either by (i) PCR as described previously (1), (ii) an in-house real-time PCR assay designed to detect *mecA*, *nuc* and *pvl* or (iii) was inferred as they yielded AR and/or PFGE typing patterns indicative of strains not previously associated with *pvl*.

<sup>b</sup>Represents approximately 5% of *pvl*-negative sporadic MRSA isolates identified each year by the NMRSARL among patients in Irish hospitals.

<sup>c</sup>One additional isolate recovered from an elderly man in the community was also included as he had been hospitalized previously on several occasions.

<sup>d</sup>Information pertaining to whether the isolate was recovered from an infection or colonization was available for 74 isolates. Ten isolates were from colonized patients and 64 were from infections and this included bloodstream infections (65.9%, 58/88) and skin and soft tissue infections (7.9%, 7/88).

**(1). Monecke S, Coombs G, Shore AC, Coleman DC, Akpaka P, Borg M, Chow H, Ip M, Jatzwauk L, Jonas D, Kadlec K, Kearns A, Laurent F, O'Brien FG, Pearson J, Ruppelt A, Schwarz S, Scicluna E, Slickers P, Tan HL, Weber S, Ehricht R. 2011. A field guide to pandemic, epidemic and sporadic clones of methicillin-resistant *Staphylococcus aureus*. PloS one 6:e17936.**
